# Supplementary material for: Technical note: Sensitivity of instrumental line shape monitoring for the ground-based high-resolution FTIR spectrometer with respect to different optical attenuators
Source: Copernicus journal article supplement (doi:10.5194/amt-10-989-2017), 2017-03-13
Supplement: Supplementary file 1 [file amt-10-989-2017-supplement.zip]

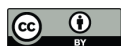

## Supplement of

# Technical note: Sensitivity of instrumental line shape monitoring for the ground-based high-resolution FTIR spectrometer with respect to different optical attenuators

Youwen Sun et al.

Correspondence to: Cheng Liu (chliu81@ustc.edu.cn)

- amt-10-989-2017-supplement-title-page.pdf
- supplement
  - HBr\_spectra
    - \* 20110101
    - \* 20110102
    - \* 20110103
    - \* 20110104
    - \* 20110105
    - \* 20110106
    - \* 20110107
    - \* 20110108
    - \* 20110109
    - \* 20110110
    - \* 20150305
    - \* 20150306
    - \* 20150307
    - \* 20150308
    - \* 20150309
    - \* 20150310
    - \* 20150311
    - \* 20150312
    - \* 20150313
    - \* hbr\_lft12.inp
  - HCl\_spectra
    - \* 20110111
    - \* 20110112
    - \* 20110113
    - \* 20110114
    - \* 20110115
    - \* 20110116
    - \* 20110117
    - \* 20110118
    - \* 20110120
    - \* 20110121
    - \* 20141122
    - \* 20150305
    - \* 20150402
    - \* 20150403
    - \* 20150404
    - \* 20150405
    - \* 20150406
    - \* 20150407
    - \* 20150408
    - \* 20150409
    - \* 20150410
    - \* hcl\_lft12.inp
  - readme.txt
  - spectra\_name\_clarification.txt

The copyright of individual parts of the supplement might differ from the CC-BY 3.0 licence.
